# Supplementary material for: A Systematic Review and Meta-Analysis of Circulating Biomarkers Associated with Failure of Arteriovenous Fistulae for Haemodialysis
Source: PubMed Central journal article supplement (PMC4961283; doi:10.1371/journal.pone.0159963), 2016-07-26

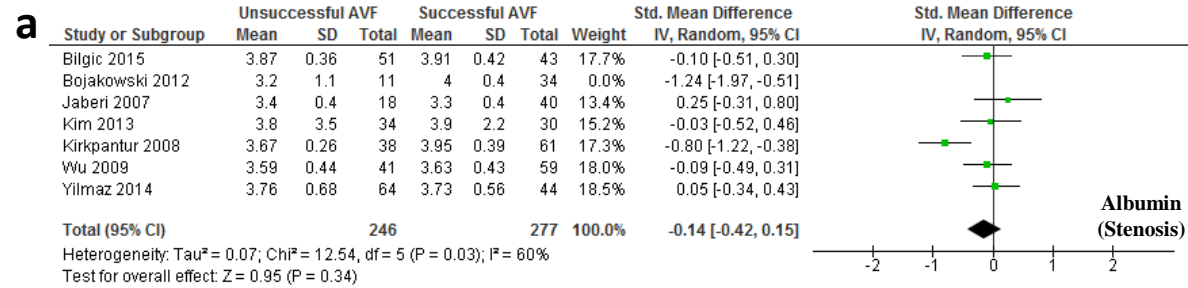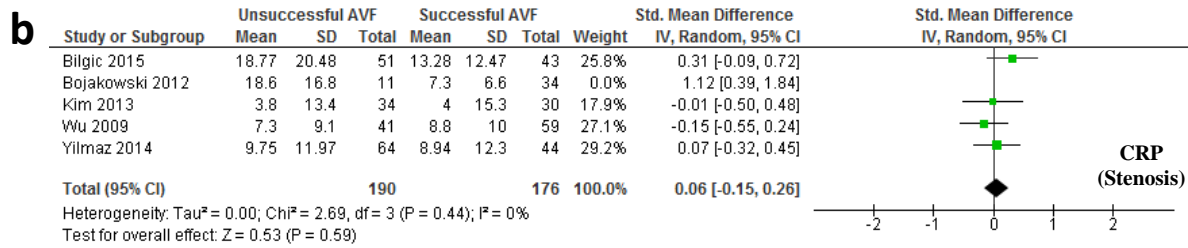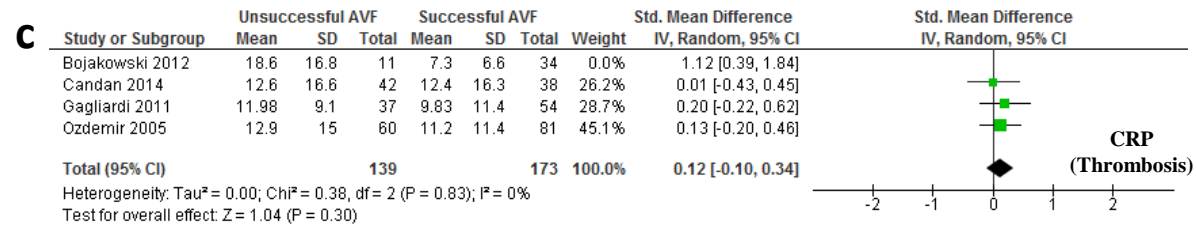

Supplement: pone.0159963.s002.pdf [file pone.0159963.s002.pdf]
