# Supplementary material for: A Systematic Review and Meta-Analysis of Circulating Biomarkers Associated with Failure of Arteriovenous Fistulae for Haemodialysis
Source: PubMed Central journal article supplement (PMC4961283; doi:10.1371/journal.pone.0159963), 2016-07-26
Supplement: pone.0159963.s003.pdf [file pone.0159963.s003.pdf]

## **S1 File. Search Strategies.**

|                                               |                                                                                                                                                                                                                                                           |
|-----------------------------------------------|-----------------------------------------------------------------------------------------------------------------------------------------------------------------------------------------------------------------------------------------------------------|
| All fields:                                   | “AVF” AND “Vascular Access”                                                                                                                                                                                                                               |
| Title/Abstract:<br><i>One term per search</i> | “biomarker” or “concentration” or “function” or<br>“dysfunction” or “maturation” or “patency” or “failure” or<br>“survival” or “thrombo*” or “steno*” or “factor” or<br>“predict*” or “serum” or “plasma” or “circulating” or “risk<br>factor” or “blood” |

### **MEDLINE**

Date limiter: January 1966 – December 2015

Date of Search: 22<sup>nd</sup> December 2015

Total Number of hits: 2266

### **EMBASE**

Date limiter: January 1966 – December 2015

Date of Search: 22<sup>nd</sup> December 2015

Total Number of hits: 1817

### **COCHRANE LIBRARY**

Date limiter: January 1966 – December 2015

Date of Search: 22<sup>nd</sup> December 2015

Total Number of hits: 152
