# Supplementary material for: A Systematic Review and Meta-Analysis of Circulating Biomarkers Associated with Failure of Arteriovenous Fistulae for Haemodialysis
Source: PubMed Central journal article supplement (PMC4961283; doi:10.1371/journal.pone.0159963), 2016-07-26
Supplement: pone.0159963.s004.pdf [file pone.0159963.s004.pdf]

# Data Extraction Form

Reviewer:

First author:

Year of publication:

## **1. Study Design**

What is the study design?

- Case control
- Cohort
  - Prospective
  - Retrospective
- Other: \_\_\_\_\_

Is the study single-centred or multi-centred?

- Single-centred
- Multi-centred

What is the total number of participants?

N = \_\_\_\_\_ participants

Are the methods for recruitment and sampling clearly stated?

- Yes
- No

If so, how were patients recruited?

\_\_\_\_\_  
\_\_\_\_\_

Was ethical approval stated? \_\_\_\_\_

What were the inclusion and exclusion criteria for participants? (AVF patients)

Inclusion criteria: \_\_\_\_\_

---

---

Exclusion

criteria: \_\_\_\_\_

---

---

What was the AV fistula outcome being assessed?

- AV fistula failure
- Primary AV fistula failure
- AV fistula dysfunction
- AV fistula thrombosis
- Other: \_\_\_\_\_

Was a definition of a working provided?

- No
  - Yes
- State: \_\_\_\_\_

How was this outcome diagnosed? (can tick more than one box)

- Clinical signs (i.e. inspection, palpation, auscultation)
- Dialysis failure
- Ultrasonography
- Angiogram/ fistulogram
- Unclear
- Other: \_\_\_\_\_

State the timing of blood collection:

- At AV fistula construction (i.e. peri-operative)
- At AV fistula failure
- At specified follow-up time. State \_\_\_\_\_
- Unclear
- Other. State \_\_\_\_\_

In brief, state the laboratory methods for quantifying biomarkers:

---

---

### **2a. Case control analysis**

State the number of cases and controls.

Cases = \_\_\_\_\_ Definition: \_\_\_\_\_

Controls = \_\_\_\_\_

Definition: \_\_\_\_\_

Is the case group further divided into subgroups?

- Yes, state subgroups and number: \_\_\_\_\_
- No

Were cases and controls matched for confounding factors?

- Yes,
- No
- Prospective study (cases & controls derived from common baseline population)

If so, list matched confounding factors (e.g. age, gender): \_\_\_\_\_

---

### **2b. Cohort studies**

At baseline, did patients have any history of vascular access failure?

- Yes, describe: \_\_\_\_\_
- No, newly constructed fistula
- Unclear

What was the number of patients recruited? \_\_\_\_\_

What was the follow up time? \_\_\_\_\_

How many patients were lost to follow up? \_\_\_\_\_

What was the final number of participants analysed?

Cases: \_\_\_\_\_ Controls: \_\_\_\_\_

#### **4. Statistical Analyses**

What statistical analyses were employed?

- Comparative analyses
  - Qualitative
    - $\chi^2$  (chi squared) test
    - Fisher's
  - Quantitative
    - Mann-Whitney U (non-parametric)
    - Student's t test (parametric)
  - Odds ratio

- Predictive analyses
  - Hazards ratio
  - Kaplan-Meier survival curve
  - Log rank test

Other: \_\_\_\_\_  
\_\_\_\_\_

Was the statistical significance set at  $p < 0.05$ ?

- Yes
- No;  
State cut-off: \_\_\_\_\_  
Give reasons:  
\_\_\_\_\_

Were multivariate analyses performed?

- No
- Yes  
State any confounding factors that have been adjusted for:

---



---



---

**3. Population Characteristics**

State available population characteristics data for cases and controls (preferred) OR combined population. List any additional important characteristic data in blank rows.

| <b>Item</b>                         | <b>Units</b> | <b>Cases</b> | <b>Controls</b> | <b>Combined Population</b> |
|-------------------------------------|--------------|--------------|-----------------|----------------------------|
| % Males                             |              |              |                 |                            |
| Age                                 |              |              |                 |                            |
| Smoking                             |              |              |                 |                            |
| Hypertension                        |              |              |                 |                            |
| Hypertension                        |              |              |                 |                            |
| Dyslipidaemia                       |              |              |                 |                            |
| BMI                                 |              |              |                 |                            |
| Radiocephalic:<br>brachiocephalic   |              |              |                 |                            |
| Kt/v                                |              |              |                 |                            |
| Duration of CRF                     |              |              |                 |                            |
| Duration of HD                      |              |              |                 |                            |
| Previous vascular<br>access failure |              |              |                 |                            |

BMI, body mass index; CRF, chronic renal failure; HD, haemodialysis

State available medication data for cases and controls (preferred) OR combined population.

| <b>Medications</b>            | <b>Dose</b> | <b>Cases</b> | <b>Controls</b> | <b>Combined Population</b> |
|-------------------------------|-------------|--------------|-----------------|----------------------------|
| Anticoagulants                |             |              |                 |                            |
| Lipid altering<br>medications |             |              |                 |                            |
| Anti-hypertensives            |             |              |                 |                            |











---

---

List any other limitations not stated by the author:

---

---

---

---
