# Supplementary material for: A Systematic Review and Meta-Analysis of Circulating Biomarkers Associated with Failure of Arteriovenous Fistulae for Haemodialysis
Source: PubMed Central journal article supplement (PMC4961283; doi:10.1371/journal.pone.0159963), 2016-07-26
Supplement: pone.0159963.s005.pdf [file pone.0159963.s005.pdf]

### S3 File. Results of the modified Ottawa-Newcastle tool to assess risk of bias in cohort studies

| Question                                                                                                                                                                                | Reference      |                |                |               |                |                |                |                |                |
|-----------------------------------------------------------------------------------------------------------------------------------------------------------------------------------------|----------------|----------------|----------------|---------------|----------------|----------------|----------------|----------------|----------------|
|                                                                                                                                                                                         | Baumann        | Bojakowski     | Gagliardi      | Jaberi        | Kaygin         | Kirkpantur     | Masaki         | Wu             | Yilmaz         |
| 1. Was selection of exposed and non-exposed cohorts drawn from the same population?                                                                                                     | Definitely Yes | Probably Yes   | Probably Yes   | Probably Yes  | Probably Yes   | Definitely Yes | Probably Yes   | Probably No    | Probably No    |
| 2. Can we be confident in the assessment of exposure?                                                                                                                                   | Definitely Yes | Definitely Yes | Definitely Yes | Probably Yes  | Probably Yes   | Probably Yes   | Probably Yes   | Probably No    | Probably Yes   |
| 3. Can we be confident that the outcome of interest was not present at start of study?                                                                                                  | Definitely Yes | Definitely Yes | Definitely Yes | Definitely No | Definitely Yes | Probably Yes   | Probably Yes   | Definitely No  | Probably Yes   |
| 4. Did the study match exposed and unexposed for all variables that are associated with the outcome of interest, or did the statistical analysis adjust for these prognostic variables? | Mostly Yes     | Mostly Yes     | Mostly Yes     | Mostly No     | Mostly Yes     | Mostly Yes     | Mostly Yes     | Mostly Yes     | Mostly Yes     |
| 5. Can we be confident in the assessment of the presence or absence of prognostic factors?                                                                                              | Probably Yes   | Definitely Yes | Definitely Yes | Probably Yes  | Definitely Yes | Probably Yes   | Definitely Yes | Probably Yes   | Probably Yes   |
| 6. Can we be confident in the assessment of outcome?                                                                                                                                    | Definitely Yes | Definitely Yes | Probably Yes   | Probably Yes  | Probably Yes   | Definitely Yes | Definitely Yes | Definitely Yes | Definitely Yes |
| 7. Was the follow up of cohorts adequate?                                                                                                                                               | Definitely Yes | Definitely Yes | Probably Yes   | Probably Yes  | Definitely Yes | Probably Yes   | Probably Yes   | Probably Yes   | Definitely Yes |
| 8. Were co-interventions similar between groups?                                                                                                                                        | Probably Yes   | Definitely Yes | Probably Yes   | Probably Yes  | Probably Yes   | Probably Yes   | Probably Yes   | Probably Yes   | Probably Yes   |
| Summary of overall risk of bias                                                                                                                                                         | Low            | Very Low       | Low            | High          | Low            | Medium         | Medium         | High           | High           |

NB: The risk of bias was considered very low if 100% questions were answered with either a 'Definitely Yes' or 'Probably/Mostly Yes', with at least 6/8 being 'Definitely Yes'; low if 100% questions were answered with either a 'Definitely Yes' or 'Probably/Mostly Yes', with at least 3/8 being 'Definitely Yes'; medium if 100% questions were answered with either a 'Definitely Yes' or 'Probably/Mostly Yes', with 2/8 or less being 'Definitely Yes'; High if 3/8 or less questions answered with either 'Definitely No' or 'Probably/Mostly No'; Very high if 4/8 or more questions were answered with either 'Definitely No' or 'Probably/Mostly No.'

Definitely Yes: Very low risk of bias; Probably/Mostly yes: Low risk of bias; Probably/Mostly no: Medium risk of bias; Definitely No: high risk of bias. Modified Ottawa-Newcastle Tool

<https://distillerccr.com/resources/>
