# Supplementary material for: A Systematic Review and Meta-Analysis of Circulating Biomarkers Associated with Failure of Arteriovenous Fistulae for Haemodialysis
Source: PubMed Central journal article supplement (PMC4961283; doi:10.1371/journal.pone.0159963), 2016-07-26
Supplement: pone.0159963.s006.pdf [file pone.0159963.s006.pdf]

## S4 File. Results of the modified Ottawa-Newcastle tool to assess risk of bias in case control studies

| Question                                                                                                                                      | Reference      |                |                |              |
|-----------------------------------------------------------------------------------------------------------------------------------------------|----------------|----------------|----------------|--------------|
|                                                                                                                                               | Bilgic         | Candan         | Kim            | Ozdemir      |
| 1. Can we be confident in the assessment of exposure?                                                                                         | Probably Yes   | Definitely Yes | Definitely Yes | Probably Yes |
| 2. Can we be confident that cases had developed the outcome of interest and controls had not?                                                 | Definitely Yes | Probably Yes   | Definitely Yes | Probably Yes |
| 3. Were the cases (those who were exposed and developed the outcome of interest) properly selected?                                           | Definitely Yes | Definitely Yes | Probably Yes   | Probably Yes |
| 4. Were the controls (those who were exposed and did not develop the outcome of interest) properly selected?                                  | Definitely Yes | Definitely Yes | Probably Yes   | Probably Yes |
| 5. Were cases and controls matches according to important prognostic variables or was statistical adjustment carried out for those variables? | Probably Yes   | Probably Yes   | Probably Yes   | Probably Yes |
| Summary of overall risk of bias                                                                                                               | Low            | Low            | Medium         | Medium       |

NB: The risk of bias was considered very low if 100% of questions were answered with 'Definitely Yes'; low if 100% of questions were answered with either a 'Definitely Yes' or 'Probably/Mostly Yes', with at least 3/5 being 'Definitely Yes'; Medium if 100% of questions were answered with either a 'Definitely Yes' or 'Probably/Mostly Yes', with at least 2/5 or less being 'Definitely Yes'; High if 2/5 or less questions answered with either 'Definitely No' or 'Probably/Mostly No'; Very high if 3/5 or more questions answered with either 'Definitely No' or 'Probably/Mostly No.'

Definitely Yes: Very low risk of bias; Probably/Mostly yes: Low risk of bias; Probably/Mostly no: Medium risk of bias; Definitely No: high risk of bias.

Modified Ottawa-Newcastle Tool (<https://distillercer.com/resources/>)
