# Supplementary material for: A Systematic Review and Meta-Analysis of Circulating Biomarkers Associated with Failure of Arteriovenous Fistulae for Haemodialysis
Source: PubMed Central journal article supplement (PMC4961283; doi:10.1371/journal.pone.0159963), 2016-07-26
Supplement: pone.0159963.s007.pdf [file pone.0159963.s007.pdf]

## S5 File. Leave-one-out sensitivity analyses for all meta-analyses

**Leave-one-out sensitivity test for the meta-analysis assessing Albumin and all AVF failure**

| Study Excluded | No. Studies | N <sub>Cases</sub> | N <sub>Controls</sub> | SMD (95%CI)         | p value* | I <sup>2</sup> | I <sup>2</sup> p value |
|----------------|-------------|--------------------|-----------------------|---------------------|----------|----------------|------------------------|
| <i>Nil</i>     | 10          | 411                | 714                   | -0.44 [-0.95, 0.07] | 0.09     | 93%            | < <b>0.001</b>         |
| Bilgic         | 9           | 360                | 671                   | -0.48 [-1.04, 0.08] | 0.09     | 93%            | < <b>0.001</b>         |
| Bojakowski     | 9           | 400                | 680                   | -0.36 [-0.90, 0.18] | 0.19     | 94%            | < <b>0.001</b>         |
| Candan         | 9           | 369                | 676                   | -0.49 [-1.04, 0.06] | 0.08     | 93%            | < <b>0.001</b>         |
| Gagliardi      | 9           | 374                | 660                   | -0.43 [-1.00, 0.14] | 0.14     | 94%            | < <b>0.001</b>         |
| Jaberi         | 9           | 393                | 674                   | -0.51 [-1.05, 0.02] | 0.06     | 93%            | < <b>0.001</b>         |
| Kaygin         | 9           | 336                | 403                   | -0.25 [-0.51, 0.02] | 0.07     | 66%            | < <b>0.003</b>         |
| Kim            | 9           | 377                | 684                   | -0.48 [-1.03, 0.07] | 0.08     | 93%            | < <b>0.001</b>         |
| Kirkpantur     | 9           | 373                | 653                   | -0.04 [-0.97, 0.17] | 0.17     | 94%            | < <b>0.001</b>         |
| Wu             | 9           | 370                | 655                   | -0.48 [-1.04, 0.08] | 0.09     | 93%            | < <b>0.001</b>         |
| Yilmaz         | 9           | 347                | 670                   | -0.50 [-1.05, 0.05] | 0.08     | 93%            | < <b>0.001</b>         |

SMD: standardised mean difference; I<sup>2</sup>: heterogeneity index; \*Calculated according to inverse-variance random-effects model. P-values in bold considered significant.

**Leave-one-out sensitivity test for the meta-analysis assessing Calcium and all AVF failure**

| Study Excluded | No. Studies | N <sub>Cases</sub> | N <sub>Controls</sub> | SMD (95%CI)         | p value* | I <sup>2</sup> | I <sup>2</sup> p value |
|----------------|-------------|--------------------|-----------------------|---------------------|----------|----------------|------------------------|
| <i>Nil</i>     | 5           | 208                | 216                   | -0.04 [-0.24, 0.15] | 0.67     | 0%             | 0.86                   |
| Bilgic         | 4           | 157                | 173                   | -0.00 [-0.23, 0.22] | 0.96     | 0%             | 0.85                   |
| Jaberi         | 4           | 190                | 176                   | -0.06 [-0.27, 0.14] | 0.54     | 0%             | 0.82                   |
| Kim            | 4           | 174                | 186                   | -0.05 [-0.26, 0.17] | 0.67     | 0%             | 0.73                   |
| Wu             | 4           | 167                | 157                   | -0.08 [-0.30, 0.14] | 0.47     | 0%             | 0.86                   |
| Yilmaz         | 4           | 144                | 172                   | -0.01 [-0.24, 0.21] | 0.91     | 0%             | 0.80                   |

SMD: standardised mean difference; I<sup>2</sup>: heterogeneity index; \*Calculated according to inverse-variance random-effects model. P-values in bold considered significant.

**Leave-one-out sensitivity test for the meta-analysis assessing Creatinine and all AVF failure**

| Study Excluded | No. Studies | N <sub>Cases</sub> | N <sub>Controls</sub> | SMD (95%CI)        | p value* | I <sup>2</sup> | I <sup>2</sup> p value |
|----------------|-------------|--------------------|-----------------------|--------------------|----------|----------------|------------------------|
| <i>Nil</i>     | 3           | 127                | 404                   | 0.08 [-0.13, 0.28] | 0.46     | 0%             | 0.84                   |
| Bojakowski     | 2           | 116                | 370                   | 0.08 [-0.13, 0.29] | 0.46     | 0%             | 0.56                   |
| Kaygin         | 2           | 52                 | 93                    | 0.15 [-0.20, 0.49] | 0.40     | 0%             | 0.75                   |
| Wu             | 2           | 86                 | 345                   | 0.04 [-0.20, 0.28] | 0.73     | 0%             | 0.97                   |

SMD: standardised mean difference; I<sup>2</sup>: heterogeneity index; \*Calculated according to inverse-variance random-effects model. P-values in bold considered significant.

**Leave-one-out sensitivity test for the meta-analysis assessing CRP and all AVF failure**

| Study Excluded | No. Studies | N <sub>Cases</sub> | N <sub>Controls</sub> | SMD (95%CI)        | p value* | I <sup>2</sup> | I <sup>2</sup> p value |
|----------------|-------------|--------------------|-----------------------|--------------------|----------|----------------|------------------------|
| <i>Nil</i>     | 9           | 415                | 694                   | 0.75 [-0.32, 1.82] | 0.17     | 98%            | < <b>0.001</b>         |
| Bilgic         | 8           | 364                | 651                   | 0.81 [-0.41, 2.02] | 0.19     | 98%            | < <b>0.001</b>         |
| Bojakowski     | 8           | 404                | 660                   | 0.71 [-0.45, 1.86] | 0.23     | 98%            | < <b>0.001</b>         |
| Candan         | 8           | 373                | 656                   | 0.84 [-0.35, 2.04] | 0.17     | 98%            | < <b>0.001</b>         |
| Gagliardi      | 8           | 378                | 640                   | 0.82 [-0.39, 2.03] | 0.18     | 98%            | < <b>0.001</b>         |
| Kaygin         | 8           | 340                | 383                   | 0.14 [-0.05, 0.33] | 0.14     | 35%            | 0.15                   |
| Kim            | 8           | 381                | 664                   | 0.85 [-0.34, 2.03] | 0.16     | 98%            | < <b>0.001</b>         |
| Ozdemir        | 8           | 355                | 613                   | 0.83 [-0.41, 2.07] | 0.19     | 98%            | < <b>0.001</b>         |
| Wu             | 8           | 374                | 635                   | 0.87 [-0.33, 2.06] | 0.16     | 98%            | < <b>0.001</b>         |
| Yilmaz         | 8           | 351                | 650                   | 0.84 [-0.38, 2.05] | 0.18     | 98%            | < <b>0.001</b>         |

CRP: C-reactive protein; SMD: standardised mean difference; I<sup>2</sup>: heterogeneity index; \*Calculated according to inverse-variance random-effects model. P-values in bold considered significant.

**Leave-one-out sensitivity test for the meta-analysis assessing Ferritin and all AVF failure**

| Study Excluded | No. Studies | N <sub>Cases</sub> | N <sub>Controls</sub> | SMD (95%CI)         | p value* | I <sup>2</sup> | I <sup>2</sup> p value |
|----------------|-------------|--------------------|-----------------------|---------------------|----------|----------------|------------------------|
| <i>Nil</i>     | 5           | 228                | 240                   | -0.01 [-0.19, 0.18] | 0.92     | 0%             | 0.92                   |
| Bilgic         | 4           | 177                | 197                   | 0.01 [-0.20, 0.21]  | 0.95     | 0%             | 0.85                   |
| Bojakowski     | 4           | 217                | 206                   | 0.01 [-0.18, 0.20]  | 0.93     | 0%             | 0.93                   |
| Candan         | 4           | 186                | 202                   | 0.00 [-0.20, 0.20]  | 1.00     | 0%             | 0.84                   |
| Ozdemir        | 4           | 168                | 159                   | -0.05 [-0.28, 0.17] | 0.63     | 0%             | 0.95                   |
| Yilmaz         | 4           | 164                | 196                   | -0.02 [-0.23, 0.20] | 0.88     | 0%             | 0.83                   |

SMD: standardised mean difference; I<sup>2</sup>: heterogeneity index; \*Calculated according to inverse-variance random-effects model. P-values in bold considered significant.

**Leave-one-out sensitivity test for the meta-analysis assessing Haemoglobin and all AVF failure**

| Study Excluded | No. Studies | N <sub>Cases</sub> | N <sub>Controls</sub> | SMD (95%CI)         | p value* | I <sup>2</sup> | I <sup>2</sup> p value |
|----------------|-------------|--------------------|-----------------------|---------------------|----------|----------------|------------------------|
| <i>Nil</i>     | 6           | 224                | 260                   | -0.10 [-0.33, 0.14] | 0.42     | 36%            | 0.17                   |
| Bilgic         | 5           | 173                | 217                   | -0.12 [-0.42, 0.18] | 0.43     | 48%            | 0.10                   |
| Bojakowski     | 5           | 213                | 226                   | -0.02 [-0.22, 0.17] | 0.80     | 0%             | 0.57                   |
| Candan         | 5           | 182                | 222                   | -0.16 [-0.41, 0.09] | 0.21     | 30%            | 0.22                   |
| Jaberi         | 5           | 206                | 220                   | -0.12 [-0.40, 0.16] | 0.40     | 48%            | 0.10                   |
| Kirkpantur     | 5           | 224                | 260                   | -0.10 [-0.33, 0.14] | 0.42     | 38%            | 0.17                   |
| Yilmaz         | 5           | 160                | 216                   | -0.14 [-0.43, 0.15] | 0.35     | 45%            | 0.12                   |

SMD: standardised mean difference; I<sup>2</sup>: heterogeneity index; \*Calculated according to inverse-variance random-effects model. P-values in bold considered significant.

**Leave-one-out sensitivity test for the meta-analysis assessing HDL-C and all AVF failure**

| Study Excluded | No. Studies | N <sub>Cases</sub> | N <sub>Controls</sub> | SMD (95%CI)         | p value* | I <sup>2</sup> | I <sup>2</sup> p value |
|----------------|-------------|--------------------|-----------------------|---------------------|----------|----------------|------------------------|
| <i>Nil</i>     | 7           | 322                | 590                   | -0.45 [-1.12, 0.23] | 0.20     | 95%            | < <b>0.001</b>         |
| Bilgic         | 6           | 271                | 547                   | -0.54 [-1.33, 0.26] | 0.19     | 95%            | < <b>0.001</b>         |
| Bojakowski     | 6           | 311                | 556                   | -0.48 [-1.23, 0.28] | 0.22     | 96%            | < <b>0.001</b>         |
| Candan         | 6           | 280                | 552                   | -0.54 [-1.33, 0.24] | 0.17     | 95%            | < <b>0.001</b>         |
| Kaygin         | 6           | 247                | 279                   | -0.57 [-1.37, 0.22] | 0.16     | 64%            | < <b>0.001</b>         |
| Kirkpantur     | 6           | 284                | 529                   | -0.18 [-0.73, 0.37] | 0.52     | 91%            | < <b>0.001</b>         |
| Wu             | 6           | 281                | 531                   | -0.56 [-1.35, 0.23] | 0.16     | 95%            | < <b>0.001</b>         |
| Yilmaz         | 6           | 258                | 546                   | -0.25 [-0.88, 0.38] | 0.44     | 93%            | < <b>0.001</b>         |

HDL-C: high density lipoprotein cholesterol; SMD: standardised mean difference; I<sup>2</sup>: heterogeneity index; \*Calculated according to inverse-variance random-effects model. P-values in bold considered significant.

**Leave-one-out sensitivity test for the meta-analysis assessing LDL-C and all AVF failure**

| Study Excluded | No. Studies | N <sub>Cases</sub> | N <sub>Controls</sub> | SMD (95%CI)         | p value*    | I <sup>2</sup> | I <sup>2</sup> p value |
|----------------|-------------|--------------------|-----------------------|---------------------|-------------|----------------|------------------------|
| <i>Nil</i>     | 7           | 322                | 590                   | -0.06 [-0.64, 0.53] | 0.85        | 93%            | < <b>0.001</b>         |
| Bilgic         | 6           | 271                | 547                   | -0.21 [-0.83, 0.42] | 0.52        | 93%            | < <b>0.001</b>         |
| Bojakowski     | 6           | 311                | 556                   | -0.09 [-0.74, 0.55] | 0.77        | 94%            | < <b>0.001</b>         |
| Candan         | 6           | 280                | 552                   | -0.08 [-0.76, 0.61] | 0.82        | 94%            | < <b>0.001</b>         |
| Kaygin         | 6           | 247                | 279                   | -0.09 [-0.86, 0.67] | 0.81        | 94%            | < <b>0.001</b>         |
| Kirkpantur     | 6           | 284                | 529                   | 0.27 [0.04, 0.50]   | <b>0.02</b> | 49%            | 0.08                   |
| Wu             | 6           | 281                | 531                   | -0.13 [-0.81, 0.56] | 0.72        | 94%            | < <b>0.001</b>         |
| Yilmaz         | 6           | 258                | 546                   | -0.08 [-0.78, 0.62] | 0.82        | 94%            | < <b>0.001</b>         |

LDL-C: low density lipoprotein cholesterol; SMD: standardised mean difference; I<sup>2</sup>: heterogeneity index; \*Calculated according to inverse-variance random-effects model. P-values in bold considered significant.

**Leave-one-out sensitivity test for the meta-analysis assessing PTH and all AVF failure**

| Study Excluded | No. Studies | N <sub>Cases</sub> | N <sub>Controls</sub> | SMD (95%CI)         | p value* | I <sup>2</sup> | I <sup>2</sup> p value |
|----------------|-------------|--------------------|-----------------------|---------------------|----------|----------------|------------------------|
| <i>Nil</i>     | 4           | 217                | 206                   | -0.04 [-0.23, 0.15] | 0.67     | 0%             | 0.83                   |
| Bilgic         | 3           | 166                | 163                   | -0.08 [-0.29, 0.14] | 0.50     | 0%             | 0.79                   |
| Candan         | 3           | 175                | 168                   | -0.01 [-0.23, 0.20] | 0.90     | 0%             | 0.76                   |
| Ozdemir        | 3           | 157                | 125                   | -0.01 [-0.24, 0.23] | 0.94     | 0%             | 0.72                   |
| Yilmaz         | 3           | 153                | 162                   | -0.07 [-0.29, 0.16] | 0.56     | 0%             | 0.71                   |

PTH: parathyroid hormone; SMD: standardised mean difference; I<sup>2</sup>: heterogeneity index; \*Calculated according to inverse-variance random-effects model. P-values in bold considered significant.

**Leave-one-out sensitivity test for the meta-analysis assessing Phosphorus and all AVF failure**

| Study Excluded | No. Studies | N <sub>Cases</sub> | N <sub>Controls</sub> | SMD (95%CI)        | <i>p</i> value* | I <sup>2</sup> | I <sup>2</sup> <i>p</i> value |
|----------------|-------------|--------------------|-----------------------|--------------------|-----------------|----------------|-------------------------------|
| <i>Nil</i>     | 5           | 208                | 216                   | 0.10 [-0.10, 0.30] | 0.32            | 4%             | 0.39                          |
| Bilgic         | 4           | 157                | 173                   | 0.13 [-0.13, 0.39] | 0.32            | 25%            | 0.26                          |
| Jaberi         | 4           | 190                | 176                   | 0.03 [-0.18, 0.24] | 0.79            | 0%             | 0.97                          |
| Kim            | 4           | 174                | 186                   | 0.13 [-0.12, 0.38] | 0.31            | 25%            | 0.26                          |
| Wu             | 4           | 167                | 157                   | 0.15 [-0.10, 0.39] | 0.23            | 16%            | 0.31                          |
| Yilmaz         | 4           | 144                | 172                   | 0.11 [-0.16, 0.38] | 0.42            | 28%            | 0.25                          |

SMD: standardised mean difference; I<sup>2</sup>: heterogeneity index; \*Calculated according to inverse-variance random-effects model. P-values in bold considered significant.

**Leave-one-out sensitivity test for the meta-analysis assessing Total Cholesterol and all AVF failure**

| Study Excluded | No. Studies | N <sub>Cases</sub> | N <sub>Controls</sub> | SMD (95%CI)        | <i>p</i> value* | I <sup>2</sup> | I <sup>2</sup> <i>p</i> value |
|----------------|-------------|--------------------|-----------------------|--------------------|-----------------|----------------|-------------------------------|
| <i>Nil</i>     | 4           | 192                | 464                   | 0.14 [-0.12, 0.41] | 0.28            | 50%            | 0.11                          |
| Candan         | 3           | 150                | 426                   | 0.14 [-0.22, 0.50] | 0.45            | 67%            | <b>0.05</b>                   |
| Gagliardi      | 3           | 155                | 410                   | 0.07 [-0.24, 0.39] | 0.67            | 58%            | 0.09                          |
| Kaygin         | 3           | 117                | 153                   | 0.08 [-0.30, 0.47] | 0.67            | 59%            | 0.08                          |
| Kirkpantur     | 3           | 154                | 403                   | 0.27 [0.07, 0.46]  | <b>0.007</b>    | 0%             | 0.73                          |

SMD: standardised mean difference; I<sup>2</sup>: heterogeneity index; \*Calculated according to inverse-variance random-effects model. P-values in bold considered significant.

**Leave-one-out sensitivity test for the meta-analysis assessing Triglycerides and all AVF failure**

| Study Excluded | No. Studies | N <sub>Cases</sub> | N <sub>Controls</sub> | SMD (95%CI)         | <i>p</i> value* | I <sup>2</sup> | I <sup>2</sup> <i>p</i> value |
|----------------|-------------|--------------------|-----------------------|---------------------|-----------------|----------------|-------------------------------|
| <i>Nil</i>     | 7           | 322                | 590                   | -0.02 [-0.17, 0.12] | 0.74            | 0%             | 0.70                          |
| Bilgic         | 6           | 271                | 547                   | -0.01 [-0.17, 0.14] | 0.86            | 0%             | 0.60                          |
| Bojakowski     | 6           | 311                | 556                   | -0.03 [-0.18, 0.12] | 0.68            | 0%             | 0.61                          |
| Candan         | 6           | 280                | 552                   | -0.04 [-0.20, 0.11] | 0.58            | 0%             | 0.67                          |
| Kaygin         | 6           | 247                | 279                   | -0.00 [-0.18, 0.17] | 0.96            | 0%             | 0.60                          |
| Kirkpantur     | 6           | 284                | 529                   | 0.01 [-0.14, 0.17]  | 0.88            | 0%             | 0.84                          |
| Wu             | 6           | 281                | 531                   | -0.06 [-0.21, 0.09] | 0.44            | 0%             | 0.82                          |
| Yilmaz         | 6           | 258                | 546                   | -0.02 [-0.18, 0.13] | 0.78            | 0%             | 0.58                          |

SMD: standardised mean difference; I<sup>2</sup>: heterogeneity index; \*Calculated according to inverse-variance random-effects model. P-values in bold considered significant.

**Leave-one-out sensitivity test for the meta-analysis assessing Albumin and AVF stenosis**

| Study Excluded | No. Studies | N <sub>Cases</sub> | N <sub>Controls</sub> | SMD (95%CI)         | p value* | I <sup>2</sup> | I <sup>2</sup> p value |
|----------------|-------------|--------------------|-----------------------|---------------------|----------|----------------|------------------------|
| <i>Nil</i>     | 7           | 257                | 311                   | -0.24 [-0.57, 0.08] | 0.14     | 71%            | <b>0.002</b>           |
| Bilgic         | 6           | 206                | 268                   | -0.28 [-0.67, 0.11] | 0.17     | 75%            | <b>0.001</b>           |
| Bojakowski     | 6           | 246                | 277                   | -0.14 [-0.42, 0.15] | 0.34     | 60%            | <b>0.03</b>            |
| Jaberi         | 6           | 239                | 271                   | -0.32 [-0.66, 0.03] | 0.07     | 72%            | <b>0.003</b>           |
| Kim            | 6           | 223                | 281                   | -0.28 [-0.66, 0.09] | 0.14     | 75%            | <b>0.001</b>           |
| Kirkpantur     | 6           | 219                | 250                   | -0.13 [-0.42, 0.16] | 0.39     | 56%            | <b>0.04</b>            |
| Wu             | 6           | 216                | 252                   | -0.28 [-0.67, 0.11] | 0.16     | 75%            | <b>0.001</b>           |
| Yilmaz         | 6           | 193                | 267                   | -0.30 [-0.68, 0.07] | 0.12     | 73%            | <b>0.002</b>           |
| <i>Nil</i> †   | 6           | 246                | 277                   | -0.14 [-0.42, 0.15] | 0.34     | 60%            | <b>0.03</b>            |
| Bilgic †       | 5           | 195                | 234                   | -0.14 [-0.49, 0.21] | 0.43     | 68%            | <b>0.01</b>            |
| Jaberi †       | 5           | 228                | 237                   | -0.20 [-0.50, 0.11] | 0.20     | 62%            | <b>0.03</b>            |
| Kim †          | 5           | 212                | 247                   | -0.15 [-0.49, 0.18] | 0.37     | 67%            | <b>0.02</b>            |
| Kirkpantur †   | 5           | 208                | 216                   | -0.01 [-0.20, 0.19] | 0.93     | 0%             | 0.87                   |
| Wu †           | 5           | 205                | 218                   | -0.14 [-0.49, 0.21] | 0.42     | 68%            | <b>0.01</b>            |
| Yilmaz †       | 5           | 182                | 233                   | -0.18 [-0.51, 0.16] | 0.31     | 65%            | <b>0.02</b>            |

SMD: standardised mean difference; I<sup>2</sup>: heterogeneity index; \*Calculated according to inverse-variance random-effects model. P-values in bold considered significant. †Analysis excluded mixed population data from Bojakowski *et al.*

**Leave-one-out sensitivity test for the meta-analysis assessing Albumin and AVF thrombosis**

| Study Excluded | No. Studies | N <sub>Cases</sub> | N <sub>Controls</sub> | SMD (95%CI)          | p value*    | I <sup>2</sup> | I <sup>2</sup> p value |
|----------------|-------------|--------------------|-----------------------|----------------------|-------------|----------------|------------------------|
| <i>Nil</i>     | 3           | 90                 | 126                   | -0.53 [-1.14, 0.08]  | 0.09        | 77%            | <b>0.01</b>            |
| Bojakowski     | 2           | 79                 | 92                    | -0.26 [-0.78, 0.25]  | 0.31        | 64%            | 0.09                   |
| Candan         | 2           | 48                 | 88                    | -0.81 [-1.50, -0.13] | <b>0.02</b> | 64%            | 0.10                   |
| Gagliardi      | 2           | 53                 | 72                    | -0.58 [-1.79, 0.63]  | 0.35        | 88%            | <b>0.004</b>           |

SMD: standardised mean difference; I<sup>2</sup>: heterogeneity index; \*Calculated according to inverse-variance random-effects model. P-values in bold considered significant.

**Leave-one-out sensitivity test for the meta-analysis assessing CRP and AVF stenosis**

| Study Excluded | No. Studies | N <sub>Cases</sub> | N <sub>Controls</sub> | SMD (95%CI)         | p value* | I <sup>2</sup> | I <sup>2</sup> p value |
|----------------|-------------|--------------------|-----------------------|---------------------|----------|----------------|------------------------|
| <i>Nil</i>     | 5           | 201                | 210                   | 0.19 [-0.14, 0.52]  | 0.26     | 61%            | <b>0.04</b>            |
| Bilgic         | 4           | 150                | 167                   | 0.17 [-0.25, 0.59]  | 0.42     | 68%            | <b>0.02</b>            |
| Bojakowski     | 4           | 190                | 176                   | 0.06 [-0.15, 0.26]  | 0.59     | 0%             | 0.44                   |
| Kim            | 4           | 167                | 180                   | 0.26 [-0.16, 0.67]  | 0.23     | 70%            | <b>0.02</b>            |
| Wu             | 4           | 160                | 151                   | 0.29 [-0.09, 0.68]  | 0.13     | 61%            | 0.06                   |
| Yilmaz         | 4           | 137                | 166                   | 0.25 [-0.20, 0.69]  | 0.27     | 70%            | <b>0.02</b>            |
| <i>Nil</i> †   | 4           | 190                | 176                   | 0.06 [-0.15, 0.26]  | 0.59     | 0%             | 0.44                   |
| Bilgic †       | 3           | 139                | 133                   | -0.03 [-0.27, 0.21] | 0.79     | 0%             | 0.73                   |
| Kim †          | 3           | 156                | 146                   | 0.07 [-0.19, 0.33]  | 0.59     | 23%            | 0.27                   |
| Wu †           | 3           | 149                | 117                   | 0.13 [-0.11, 0.38]  | 0.28     | 0%             | 0.54                   |
| Yilmaz †       | 3           | 126                | 132                   | 0.05 [-0.24, 0.34]  | 0.72     | 26%            | 0.26                   |

CRP: C-reactive protein; SMD: standardised mean difference; I<sup>2</sup>: heterogeneity index; \*Calculated according to inverse-variance random-effects model. P-values in bold considered significant.

†Analysis excluded mixed population data from Bojakowski *et al.*

**Leave-one-out sensitivity test for the meta-analysis assessing CRP and AVF thrombosis**

| <b>Study Excluded</b> | <b>No. Studies</b> | <b>N<sub>Cases</sub></b> | <b>N<sub>Controls</sub></b> | <b>SMD (95%CI)</b> | <b>p value*</b> | <b>I<sup>2</sup></b> | <b>I<sup>2</sup> p value</b> |
|-----------------------|--------------------|--------------------------|-----------------------------|--------------------|-----------------|----------------------|------------------------------|
| <i>Nil</i>            | 4                  | 150                      | 207                         | 0.27 [-0.08, 0.62] | 0.13            | 57%                  | 0.07                         |
| Bojakowski            | 3                  | 139                      | 173                         | 0.12 [-0.10, 0.34] | 0.30            | 0%                   | 0.83                         |
| Candan                | 3                  | 108                      | 169                         | 0.38 [-0.08, 0.85] | 0.11            | 67%                  | <b>0.05</b>                  |
| Gagliardi             | 3                  | 113                      | 153                         | 0.33 [-0.18, 0.84] | 0.21            | 72%                  | <b>0.03</b>                  |
| Ozdemir               | 3                  | 90                       | 126                         | 0.37 [-0.17, 0.91] | 0.18            | 70%                  | <b>0.04</b>                  |
| <i>Nil †</i>          | 3                  | 139                      | 173                         | 0.12 [-0.10, 0.34] | 0.30            | 0%                   | 0.83                         |
| Candan †              | 2                  | 97                       | 135                         | 0.16 [-0.10, 0.42] | 0.24            | 0%                   | 0.79                         |
| Gagliardi †           | 2                  | 102                      | 119                         | 0.09 [-0.18, 0.35] | 0.52            | 0%                   | 0.68                         |
| Ozdemir †             | 2                  | 79                       | 92                          | 0.11 [-0.19, 0.41] | 0.47            | 0%                   | 0.54                         |

CRP: C-reactive protein; SMD: standardised mean difference; I<sup>2</sup>: heterogeneity index; \*Calculated according to inverse-variance random-effects model. P-values in bold considered significant.

†Analysis excluded mixed population data from Bojakowski *et al.*
